# Supplementary material
Source: PubMed Central journal article supplement (PMC2740547)

**Fig. S1. Western blot profile of chromosomally encoded Jen1-GFP upon glucose addition.** *end3-*Its cells expressing *JEN1*-GFP under its own promoter were induced for the production of Jen1-GFP in lactic acid for 3.5 hours at the permissive temperature (23°C), then for 30 min at the restrictive temperature (30°C). Protein extracts from induced cells were prepared before and at the indicated times after the addition of 2% glucose at 30°C and were then analyzed by western immunoblotting with an anti-GFP antibody. The sizes of molecular weight markers are indicated.

Figure S1

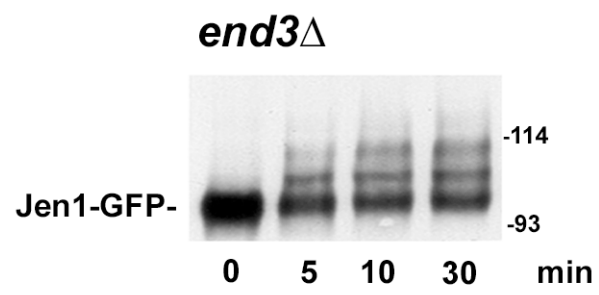

Supplement: supp_M109.008318_jbc.M109.008318-1.pdf [file supp_M109.008318_jbc.M109.008318-1.pdf]
